# Supplementary material for: Metabolomics reveal the protective effect of Farfarae Flos against asthma using an OVA-induced rat model
Source: Royal Society of Chemistry journal article supplement (doi:10.1039/c7ra05340a), 2017-01-01
Supplement: c7ra05340a1.pdf [file c7ra05340a1.pdf]

## **Metabolomic reveal the protective effect of Farfarae Flos against asthma using an OVA-induced rat model**

Jing Li<sup>1,2</sup>, Wei Gao<sup>3</sup>, Jining Gao<sup>4</sup>, Hong Li<sup>4</sup>, Xiang Zhang<sup>5</sup>, Xuemei Qin<sup>1</sup>, Zhenyu Li<sup>1\*</sup>

<sup>1</sup> Modern Research Center for Traditional Chinese Medicine of Shanxi University, No. 92, Wucheng Road, Taiyuan 030006, Shanxi, People's Republic of China

<sup>2</sup> College of Chemistry and Chemical Engineering of Shanxi University, No. 92, Wucheng Road 92, Taiyuan 030006, Shanxi, People's Republic of China

<sup>3</sup> Department of Otolaryngology, Head & Neck Surgery, The First Hospital Affiliated With Shanxi Medical University, People's Republic of China

<sup>4</sup> Shanxi Hospital of Integrated Traditional and Western Medicine, Taiyuan 030000, People's Republic of China

<sup>5</sup> Departments of Chemistry and Pharmacology & Toxicology, University of Louisville, KY 40292, USA

\*Corresponding author: Tel.: +86-351-7018379.

E-mail address: lizhenyu@sxu.edu.cn .

### The identification of the compounds by LC-MS

Compound **2**, gave  $[M+H]^+$  ion at  $m/z$  431.2794 and  $[M+Na]^+$  ion at  $m/z$  453.2617 in positive ion mode, and was identified as 7 $\beta$ -(3'-Ethyl-cis-crotonoyloxy)-1 $\alpha$ -(2'-methylbutyryloxy)-3(14)-dehydro-*Z*-notonipetranone (C<sub>26</sub>H<sub>38</sub>O<sub>5</sub>). It produced fragment ions at  $m/z$  351.1933  $[M+Na-MebuO]^+$ ,  $m/z$  339.1933  $[M+Na-MesenO]^+$ ,  $m/z$  255.1352  $[M+Na-MesenO-Mebu]^+$ ,  $m/z$  237.1252  $[M+Na-MesenO-MebuO]^+$ ,  $m/z$  215.1433  $[M+H-MesenO-MebuO]^+$ ,  $m/z$  173.0963 in MS<sup>2</sup> spectra, and its possible fragment pathway was shown in Fig. S9A. The identification of the compound **2** was further confirmed by comparison with the authentic standard. Compounds **5** showed the same adduct ion at  $m/z$  at 431.2794  $[M+H]^+$  and 453.2617  $[M+Na]^+$ , suggesting the same molecular formula of C<sub>26</sub>H<sub>38</sub>O<sub>5</sub>. Thus, it was an double bond isomer of compound **5**, and identified as 7 $\beta$ -(3'-Ethyl-cis-crotonoyloxy)-1 $\alpha$ -(2'-methylbutyryloxy)-3(14)-dehydro-*E*-notonipetranone. Compound **3** showed  $[M+H]^+$  ion at  $m/z$  391.2478, and was identified as tussilagone by comparing with the standard compound. Compound **6** exhibited  $[M+H]^+$  ion at  $m/z$  491.3003 and  $[M+Na]^+$  ion at  $m/z$  513.2819, which was 100 Da than that of tussilagone. As C-1 was usually substituted by a MebuO group, thus, compound **6** was tentatively identified as 14-acetoxy-7 $\beta$ -(3'-ethyl cis-crotonoyloxy) -1 $\alpha$ -(2'-methyl butyryloxy)-notonipetranone. Compound **8** gave  $[M+H]^+$  ion at  $m/z$  507.2949 and  $[M+Na]^+$  ion at  $m/z$  529.2769 and produced predominant fragment ions at  $m/z$  447.2741  $[M+H-OAC]^+$ ,  $m/z$  431.2792  $[M+H-OAC-O]^+$ ,  $m/z$  347.2215  $[M+H-OAC-O-Mebu]^+$ ,  $m/z$  317.2110  $[M+H-OAC-O-MesenO]^+$ ,  $m/z$  233.1535  $[M+H-OAC-O-MesenO-Mebu]^+$  in MS<sup>2</sup> spectra, and was identified as tussilagolactone. The possible fragment pathway for compound **8** was shown in Fig. S9B. Compound **9** showed protonated molecule  $[M+H]^+$  at  $m/z$  345.2061 in positive MS spectra, suggesting a possible molecular formula of C<sub>21</sub>H<sub>28</sub>O<sub>4</sub>. It was 162 Da smaller than compound **8**, which was in agreement with a MebuO at C-1 and an AcO group at C-3, thus, it was tentatively identified as 7 $\beta$ -(3'-ethylcis-crotonoyloxy)-5,6-dehydro-3,14-dehydro-*Z*-notonipetralactone.

For the standard available compound **1**, it was identified by comparing retention time and accurate mass and identified as 2,2-dimethyl-6-acetylchromanone (Fig. S9C).

**Table S1** <sup>1</sup>H NMR assignments of major metabolites from the petroleum ether extract of FF.

| No. | Metabolite                                                                          | Assignment | δ <sup>1</sup> H multiplicity |
|-----|-------------------------------------------------------------------------------------|------------|-------------------------------|
| 1   | 2,2-dimethyl-6-acetylchromanone                                                     | CH3        | 1.50 (s)                      |
|     |                                                                                     | -COCH3     | 2.60 (s)                      |
|     |                                                                                     | 2-H        | 2.78 (s)                      |
|     |                                                                                     | 8-H        | 7.00 (d, 8.8 Hz)              |
|     |                                                                                     | 7-H        | 8.14 (dd, 2.4, 8.0 Hz)        |
|     |                                                                                     | 5-H        | 8.44 (d, 2.4 Hz)              |
|     |                                                                                     | CH3-4"     | 0.88 (t, 7.4 Hz)              |
|     |                                                                                     | CH3-5'     | 1.07 (t, 7.5 Hz)              |
| 2   | 7β-(3-Ethyl-cisrotonoyloxy)-1α-(2-methylbutyryloxy)-3(14)-dehydro-Z-notonipetranone | CH3-5"     | 1.13 (d, 6.6 Hz)              |
|     |                                                                                     | CH3-6'     | 2.15 (s)                      |
|     |                                                                                     | CH-10a     | 4.80 (s)                      |
|     |                                                                                     | CH-10b     | 5.17 (s)                      |
|     |                                                                                     | CH-14      | 6.38 (q, 6.6 Hz)              |
|     |                                                                                     | CH3-13     | 0.78 (d, 6.6 Hz)              |
|     |                                                                                     | CH3-12     | 0.98 (d, 6.6 Hz)              |
|     |                                                                                     | CH3-5'     | 1.08 (t, 7.3 Hz)              |
| 3   | Tussilagone                                                                         | CH3-15     | 1.22 (d, 6.7 Hz)              |
|     |                                                                                     | OAc        | 2.11 (s)                      |
|     |                                                                                     | CH3-6'     | 2.15 (s)                      |
|     |                                                                                     | CH-10a     | 4.79 (s)                      |
|     |                                                                                     | CH-10b     | 5.14 (s)                      |
|     |                                                                                     | CH-7       | 5.58 (brt, 2.3 Hz)            |
|     |                                                                                     | CH-2'      | 5.63 (s)                      |
|     |                                                                                     | CH-1       | 5.86 (d, 12.5)                |
| 4   | 1β,8-bisangeloyloxy -3β,4β-epoxybisabola-7(14),10-diene                             | CH2-14     | 6.08 (S)                      |
|     |                                                                                     | CH3-15     | 1.46 (S)                      |
|     |                                                                                     | CH2-3'     | 6.06 (qq, 1.5,7.0)            |
|     |                                                                                     | CH2-3"     | 6.06 (qq, 1.5,7.0)            |
|     |                                                                                     | CH3-5'     | 1.89 (qq, 1.5,1.5)            |
|     |                                                                                     | CH3-5"     | 1.91 (qq, 1.5,1.5)            |
|     |                                                                                     | CH3-4"     | 0.88 (t, 7.4 Hz)              |
|     |                                                                                     | CH3-5'     | 1.07 (t, 7.5 Hz)              |
| 5   | 7β-(3-Ethyl-cisrotonoyloxy)-1α-(2-methylbutyryloxy)-3(14)-dehydro-E-notonipetranone | CH3-5"     | 1.13 (d, 6.6 Hz)              |
|     |                                                                                     | CH3-6'     | 2.15 (s)                      |
|     |                                                                                     | CH-10a     | 4.80 (s)                      |
|     |                                                                                     | CH-10b     | 5.17 (s)                      |
|     |                                                                                     | CH-14      | 6.70 (q, 6.6 Hz)              |

|   |                                                                                                    |         |                  |
|---|----------------------------------------------------------------------------------------------------|---------|------------------|
| 6 | 14-acetoxy-7 $\beta$ -(3'-Ethyl-ciscrotonoyloxy)-1 $\alpha$ -(2'-methylbutyryloxy)-notonipetranone | CH-1    | 5.45 (d, 3.0)    |
|   |                                                                                                    | CH3-12  | 1.00 (d, 6.6 Hz) |
|   |                                                                                                    | CH3-13  | 0.82 (d, 6.6 Hz) |
|   |                                                                                                    | CH2-14  | 5.16 (m)         |
|   |                                                                                                    | CH3-15  | 1.23 (d, 6.0)    |
|   |                                                                                                    | CH3-5'  | 1.07 (t, 7.8)    |
|   |                                                                                                    | CH3-6'  | 2.10 (S)         |
|   |                                                                                                    | CH3-4'' | 0.89 (t, 7.8)    |
|   |                                                                                                    | CH3-5'' | 1.15 (t, 7.8)    |
|   |                                                                                                    | CH-7    | 5.57 (t, 3.0)    |
|   |                                                                                                    | CH3-12  | 0.98 (d, 6.9 Hz) |
| 7 | 14-acetoxy-7 $\beta$ -angeloyloxy-notonipetranone                                                  | CH3-13  | 0.78 (d, 6.9 Hz) |
|   |                                                                                                    | CH3-15  | 1.23 (d, 6.0)    |
|   |                                                                                                    | CH3-4'  | 0.89 (d, 1.1)    |
|   |                                                                                                    | CH3-5'  | 2.15 (d, 1.1)    |

**TableS2** Chemical constituents identified in extracts from the petroleum ether extract of FF.

| No. | t <sub>R</sub> | Molecular Formula | Selected ion                              | Experimental           | Theoretical            | Error (ppm)    | MS/MS fragmentaion                                                               | Identification                                                                          |
|-----|----------------|-------------------|-------------------------------------------|------------------------|------------------------|----------------|----------------------------------------------------------------------------------|-----------------------------------------------------------------------------------------|
| 1   | 1.211          | C13H14O3          | [M+H] <sup>+</sup>                        | 219.10179              | 219.10157              | 1              | 177.0910<br>163.0389                                                             | 2,2-dimethyl-6-acetylchromanone                                                         |
| 2   | 8.930          | C26H38O5          | [M+H] <sup>+</sup><br>[M+Na] <sup>+</sup> | 431.27942<br>453.26178 | 431.27920<br>453.26137 | 0.508<br>1.400 | 351.1933<br>339.1933<br>255.1352<br>237.1252<br>215.1433<br>173.0963<br>137.0578 | 7β-(3'-Ethyl-cis-crotonoyloxy)-1α-(2'-methylbutyryloxy)-3(14)-dehydro-Z-notonipetranone |
| 3   | 7.94           | C23H34O5          | [M+H] <sup>+</sup>                        | 391.24789              | 391.24790              | -0.027         | 331.2270<br>218.1301<br>217.1590<br>175.1482<br>133.1014                         | Tussilagone                                                                             |
| 5   | 10.413         | C26H38O5          | [M+H] <sup>+</sup><br>[M+Na] <sup>+</sup> | 431.27942<br>453.26178 | 431.27920<br>453.26137 | 0.508<br>1.400 | 351.1931<br>339.1933<br>255.1351<br>237.1250<br>215.1433<br>173.0963<br>137.0578 | 7β-(3'-Ethyl-cis-crotonoyloxy)-1α-(2'-methylbutyryloxy)-3(14)-dehydro-E-notonipetranone |
| 6   | 6.071          | C28H42O7          | [M+H] <sup>+</sup>                        | 491.30033              | 491.30033              | 1.099          | 453.2612                                                                         | 14-acetoxy-7β-                                                                          |

|   |       |                                                |                     |           |           |       |                                                                                              |                                                                                                         |
|---|-------|------------------------------------------------|---------------------|-----------|-----------|-------|----------------------------------------------------------------------------------------------|---------------------------------------------------------------------------------------------------------|
|   |       |                                                | [M+Na] <sup>+</sup> | 513.28198 | 513.30087 | 2.290 | 351.1926<br>339.1928<br>255.1349<br>237.1246<br>215.1432<br>173.0958<br>137.0573<br>125.0573 | (3'-ethyl cis-<br>crotonoyloxy) -l $\alpha$ -<br>(2'-methyl<br>butyryloxy)-<br>notonipetranone          |
| 8 | 4.962 | C <sub>28</sub> H <sub>42</sub> O <sub>8</sub> | [M+H] <sup>+</sup>  | 507.29498 | 507.29587 | 1.233 | 447.2741<br>431.2792<br>347.2215<br>317.2110<br>233.1535                                     | tussilagolactone                                                                                        |
| 9 | 2.936 | C <sub>21</sub> H <sub>28</sub> O <sub>4</sub> | [M+H] <sup>+</sup>  | 345.20618 | 345.20604 | 0.4   | 217.1587                                                                                     | 7 $\beta$ -(3'-ethylcis-<br>crotonoyloxy)-<br>5,6-dehydro-3,14-<br>dehydro-Z-<br>notonipetralacton<br>e |

**Table S3** <sup>1</sup>H NMR assignments of major metabolites from rat lung.

| No. | Metabolites       | <sup>1</sup> H chemical shift (multiplicity) | No. | Metabolites             | <sup>1</sup> H chemical shift (multiplicity) |
|-----|-------------------|----------------------------------------------|-----|-------------------------|----------------------------------------------|
| 1   | Isoleucine        | 0.95(d) <sup>a</sup> , 1.01(d)               | 22  | Choline                 | 3.2(s)                                       |
| 2   | Leucine           | 0.97(t),                                     | 23  | GPC <sup>b</sup>        | 3.22(s), 3.63(m)                             |
| 3   | Valine            | 0.99(d), 1.05(d)                             | 24  | PC <sup>b</sup>         | 3.23(s), 3.61(t)                             |
| 4   | 3-HB <sup>b</sup> | 1.20(d), 2.31(dd), 2.41(dd)                  | 25  | PE <sup>b</sup>         | 3.23(t), 3.99(m)                             |
| 5   | Lactate           | 1.33(d), 4.12(q)                             | 26  | Taurine                 | 3.27(t), 3.43(t)                             |
| 6   | lysine            | 1.49(m), 1.72(m), 1.92(m)                    | 27  | Betaine                 | 3.27(s), 3.90(s)                             |
| 7   | Alanine           | 1.49(d)                                      | 28  | <i>scyllo</i> -inositol | 3.36(s)                                      |
| 8   | Arginine          | 1.70(m), 1.92(m)                             | 29  | Methyl phosphate        | 3.47(d)                                      |
| 9   | Ornithine         | 1.75(m), 1.93(m)                             | 30  | Adenosine               | 6.10(d), 8.24(s), 8.35(s)                    |
| 10  | Acetate           | 1.93(s)                                      | 31  | β-glucose               | 4.65(d)                                      |
| 11  | Glutamate         | 2.05(m), 2.34(m), 3.75(m)                    | 32  | Glycine                 | 3.56(s)                                      |
| 12  | Methionine        | 2.14(s), 2.14(m), 2.64(t), 3.85(m)           | 33  | α-glucose               | 5.24(d)                                      |
| 13  | Glutamine         | 2.15(m), 2.44(m), 3.77(m)                    | 34  | Cytidine                | 5.91(d), 6.07(d), 7.85(d)                    |
| 14  | GSSG <sup>b</sup> | 2.17(m), 2.54(m), 2.95(m), 3.25(m)           | 35  | Uracil                  | 5.81(d), 7.55(d)                             |
| 15  | Ethanolamine      | 3.15(t), 3.84(t)                             | 36  | Fumarate                | 6.53(s)                                      |
| 16  | Succinate         | 2.40(s)                                      | 37  | Tyrosine                | 6.91(d), 7.20(d)                             |
| 17  | Pyruvate          | 2.37(s)                                      | 38  | Phenylalanine           | 7.33(d), 7.43(t)                             |
| 18  | Aspartate         | 2.67(dd), 2.82(dd)                           | 39  | Niacinamide             | 7.60(dd), 8.26(d), 8.72(d), 8.94(s)          |
| 19  | DMA <sup>b</sup>  | 2.72(s)                                      | 40  | Xanthine                | 7.91(s)                                      |
| 20  | TMA <sup>b</sup>  | 2.88(s)                                      | 41  | Hypoxanthine            | 8.20(s), 8.22(s)                             |
| 21  | Creatine          | 3.04(s), 3.94(s)                             | 42  | Formate                 | 8.46(s)                                      |

<sup>a</sup>Multiplicity for <sup>1</sup>H resonances: s: singlet, d: doublet, t: triplet, m: multiplet, dd: doublet of doublet.

<sup>b</sup>Keys: GSSG, glutathione disulfide; 3-HB, 3-hydroxybutyrate; DMA, dimethylamine; TMA, trimethylamine; GPC, glycerophosphocholine; PC, phosphocholine; PE, phosphoethanolamine;.

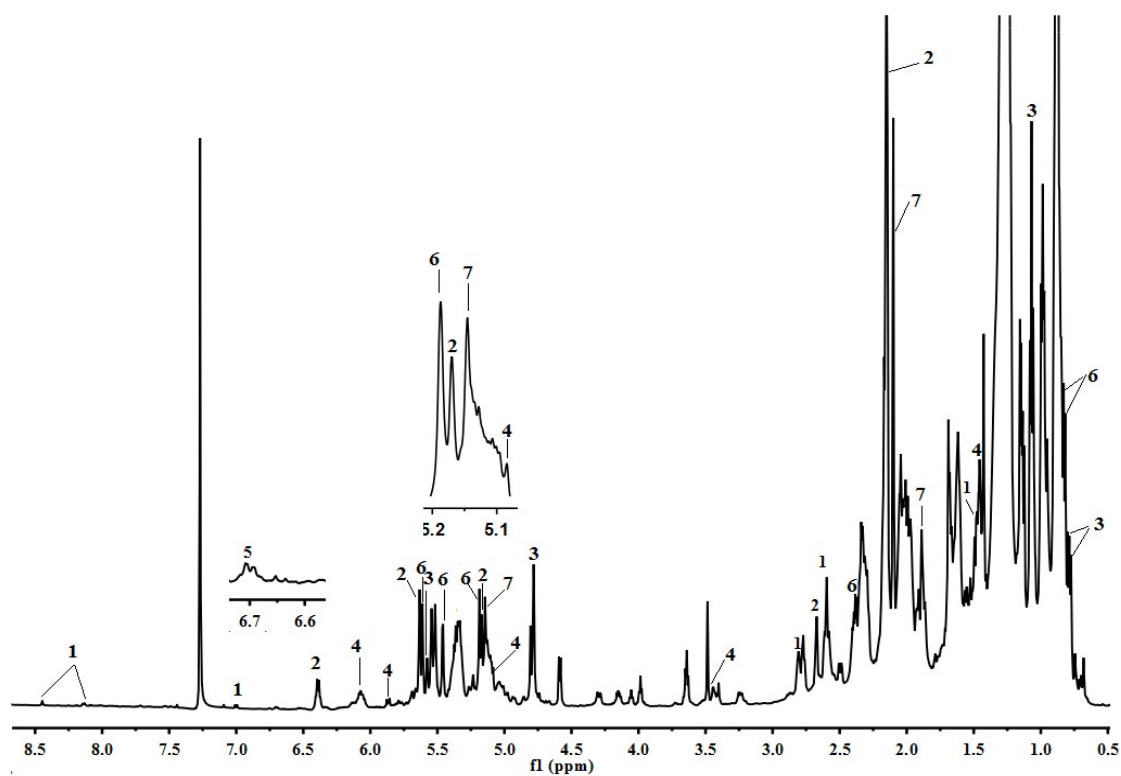

**Figure S1** Typical  $^1\text{H}$  NMR spectra of PEFF of FF.

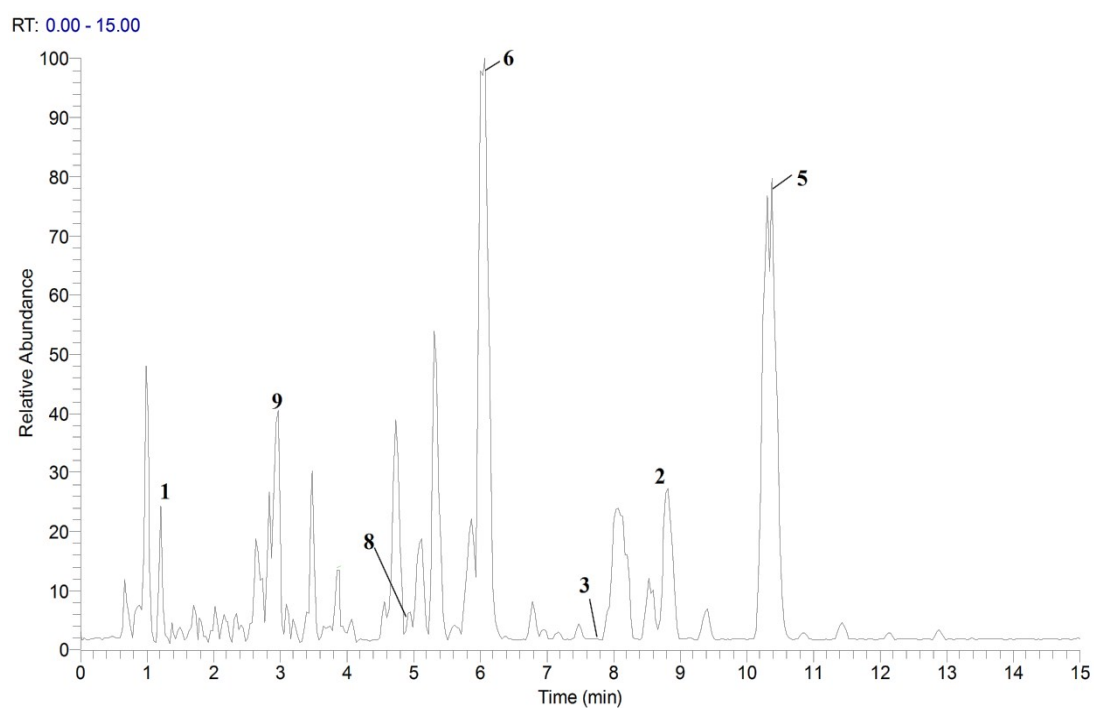

**Figure S2** LC-MS chromatograms of PEFF of FF.

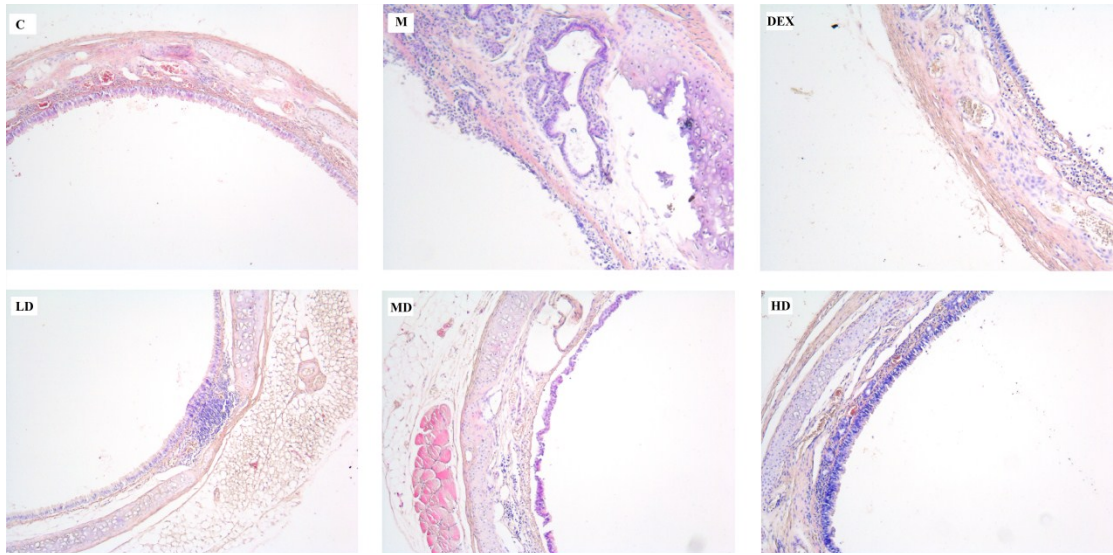

**Figure S3** Histopathological photomicrographs of trachea, and C mean control group, M mean model group, DEX mean dexamethasone group, LD mean low dose group, MD mean middle dose group, and HD mean high dose group.

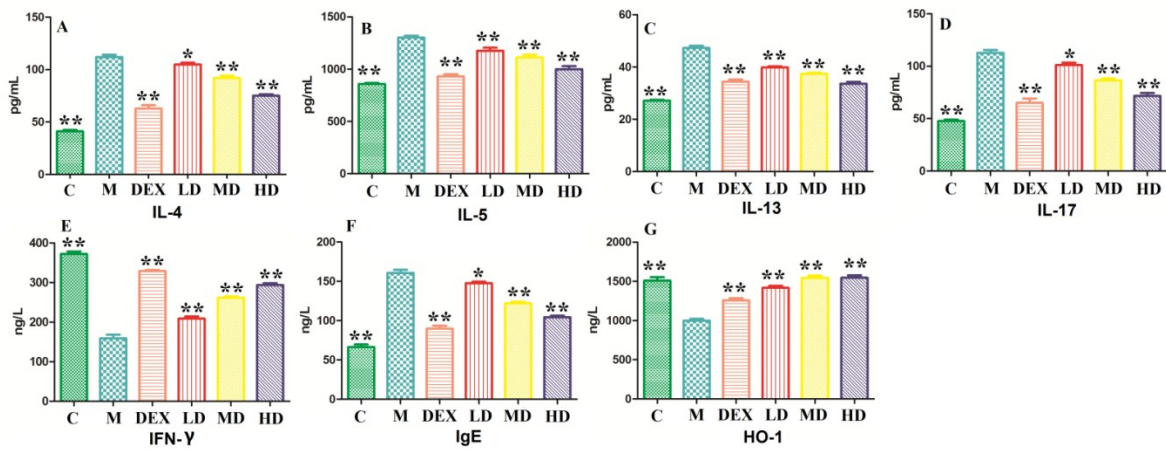

**Figure S4** Quantification of inflammatory cytokines in serum as determined by ELISA. The statistical significance of differences between model group and other groups (n=6) are indicated as  $p < 0.05$  (\*) and  $p < 0.01$  (\*\*).

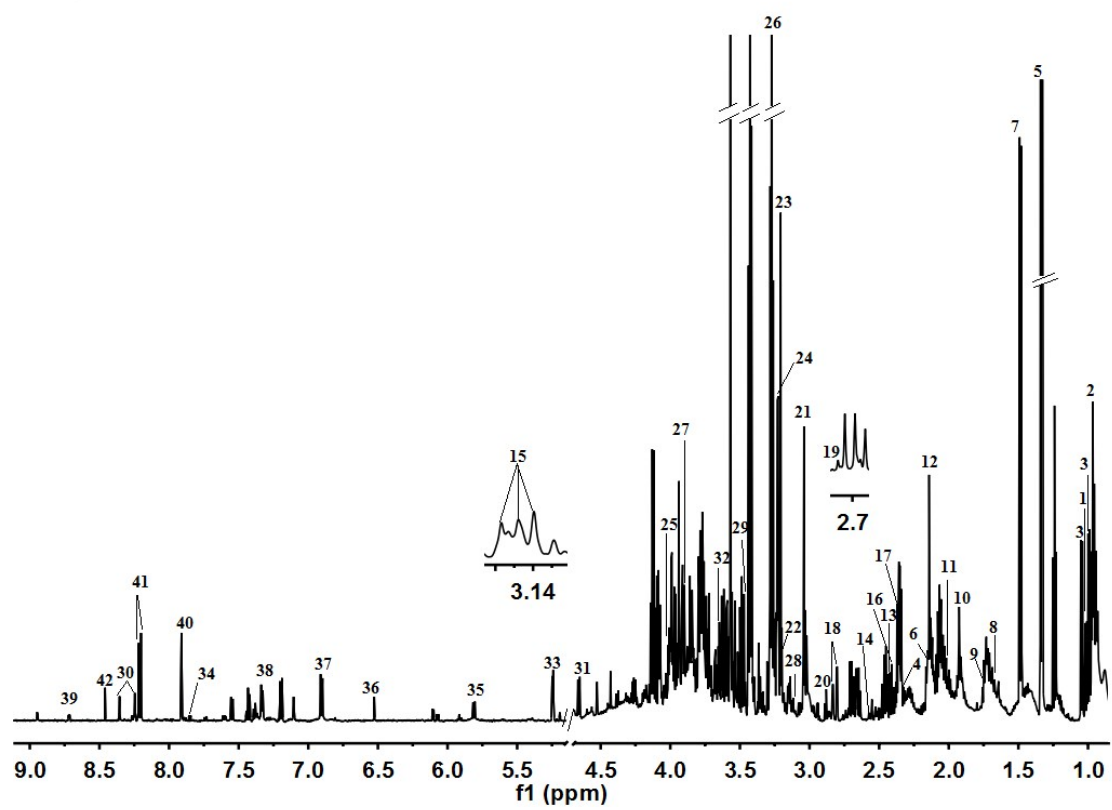

**Figure S5** Representative  $^1\text{H}$  NMR spectra of lung samples obtained from control group of rats.

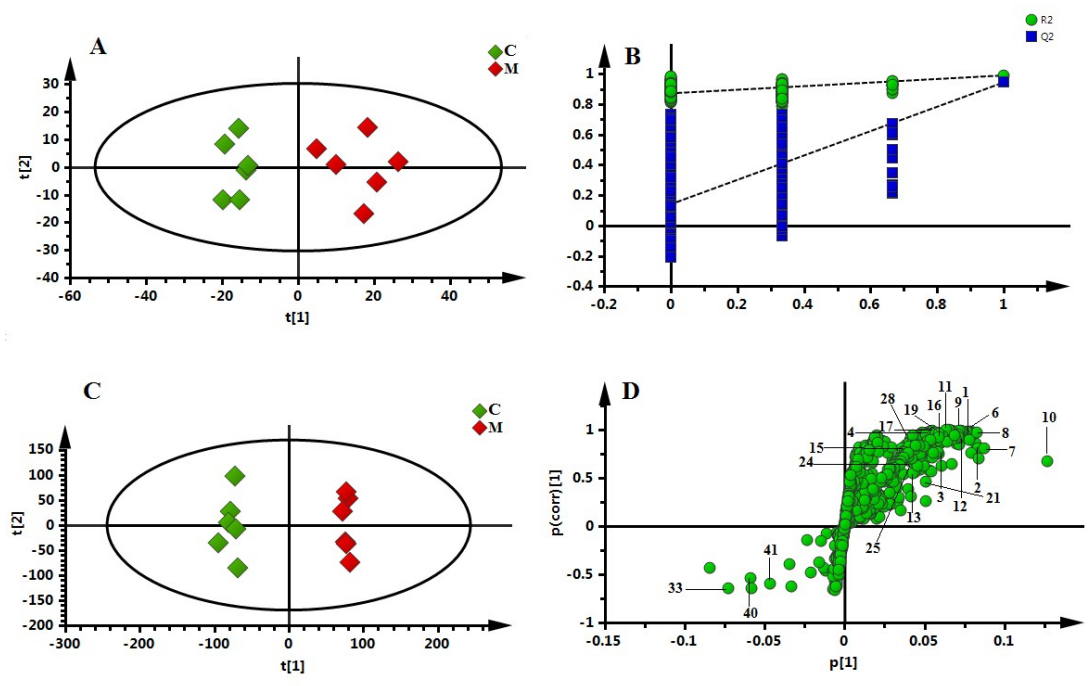

**Figure S6** PCA (A) score plots, permutation test model validation plots (B), OPLS-DA (C) score plots, , and S-plot (D) based on  $^1\text{H}$ -NMR data of lung homogenates from the control

and model groups (n=6).

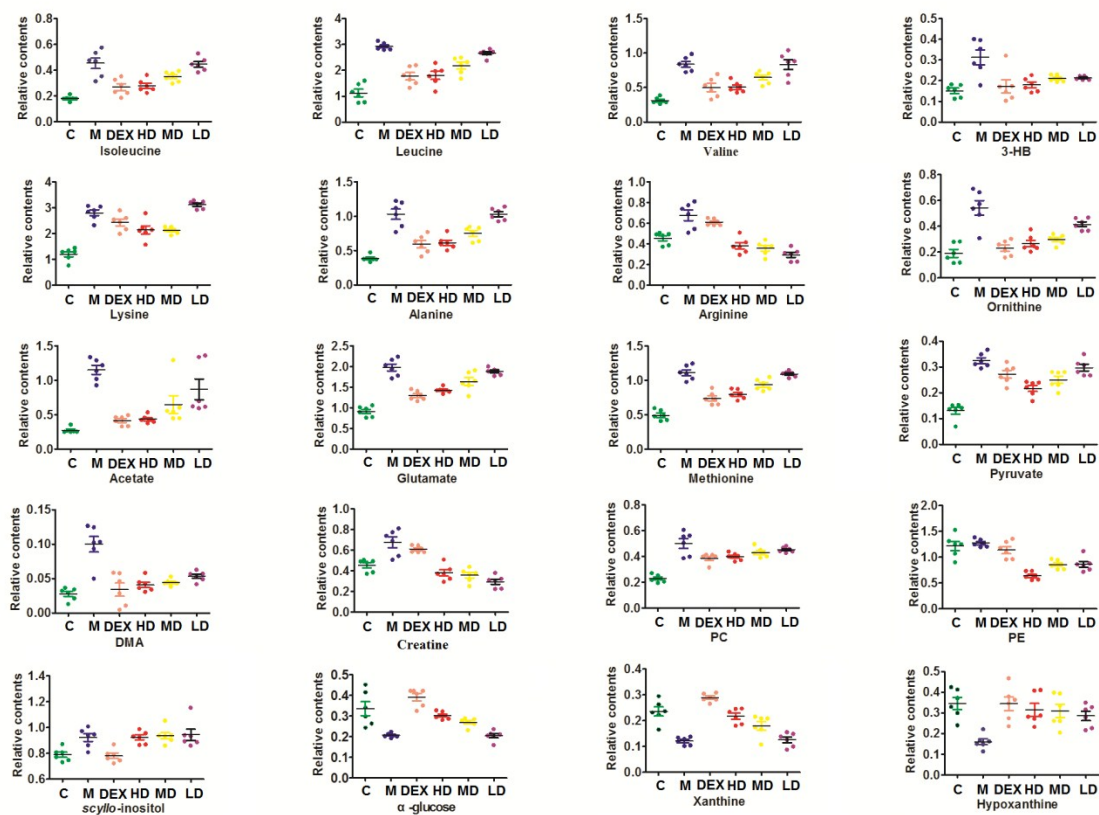

**Figure S7** Quantification of metabolites identified in lung homogenates of PEEF (n=6).

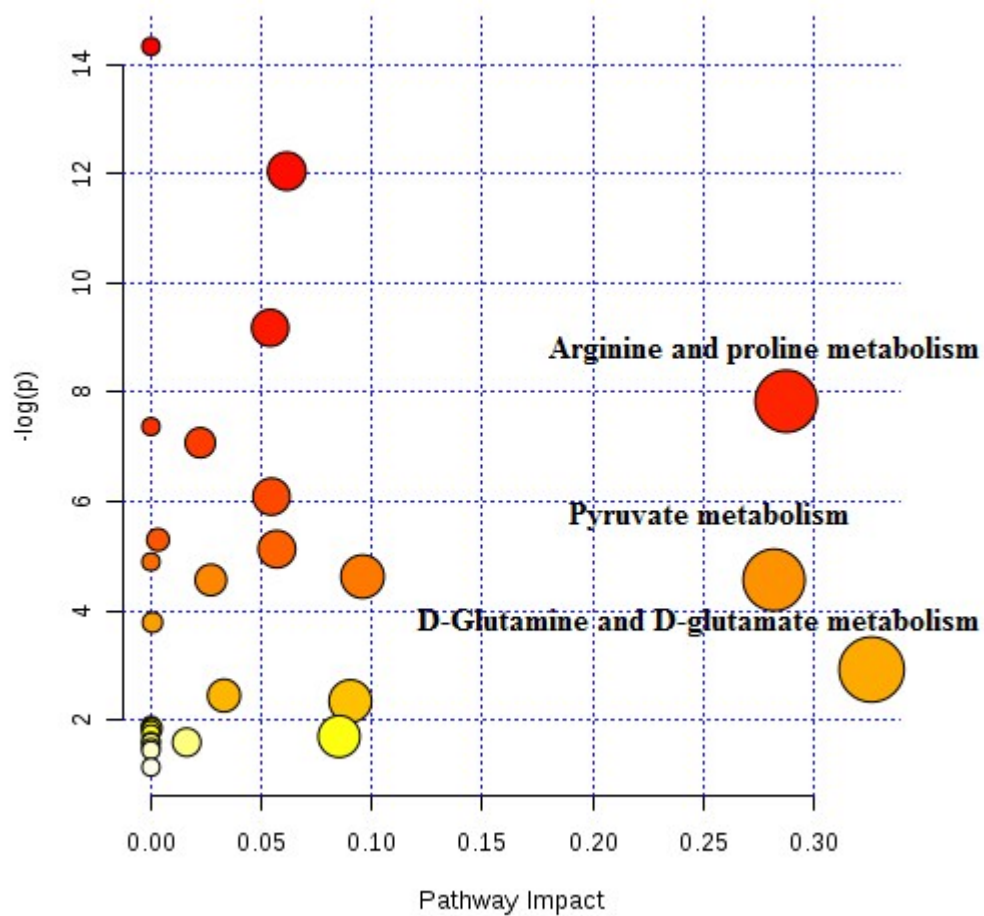

**Figure S8** Summary of pathway analysis with MetPA.

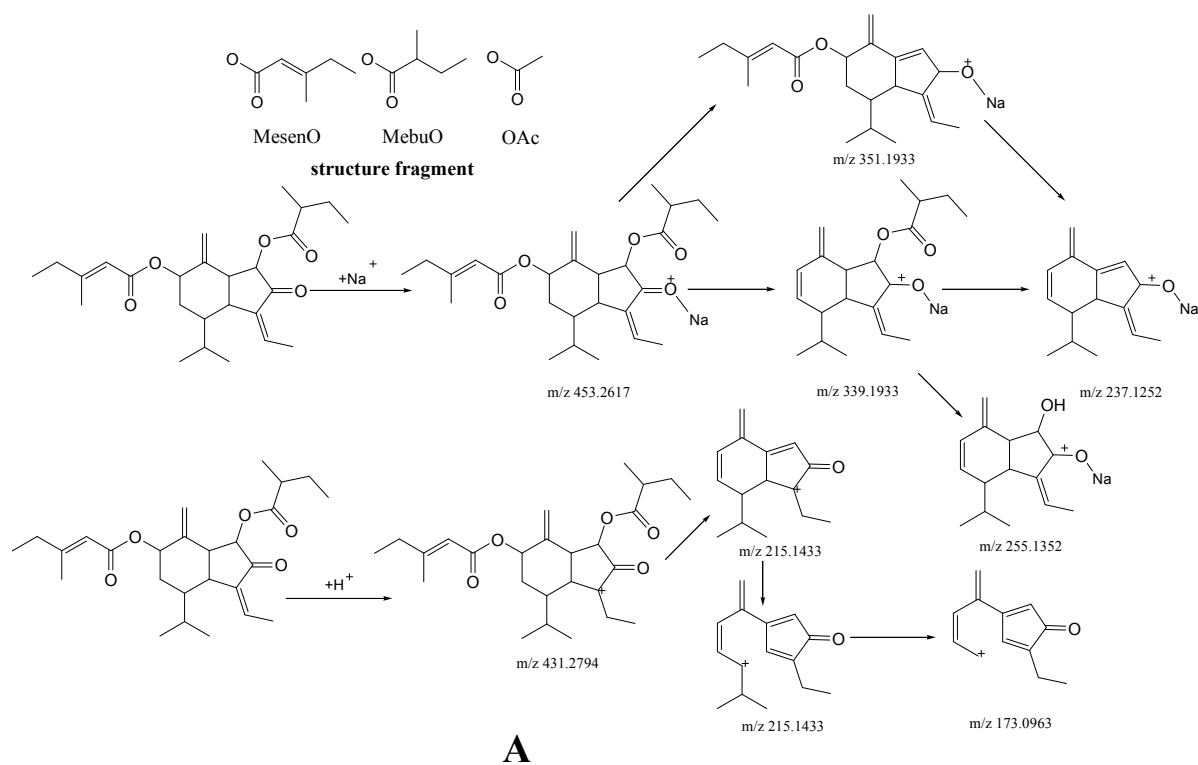

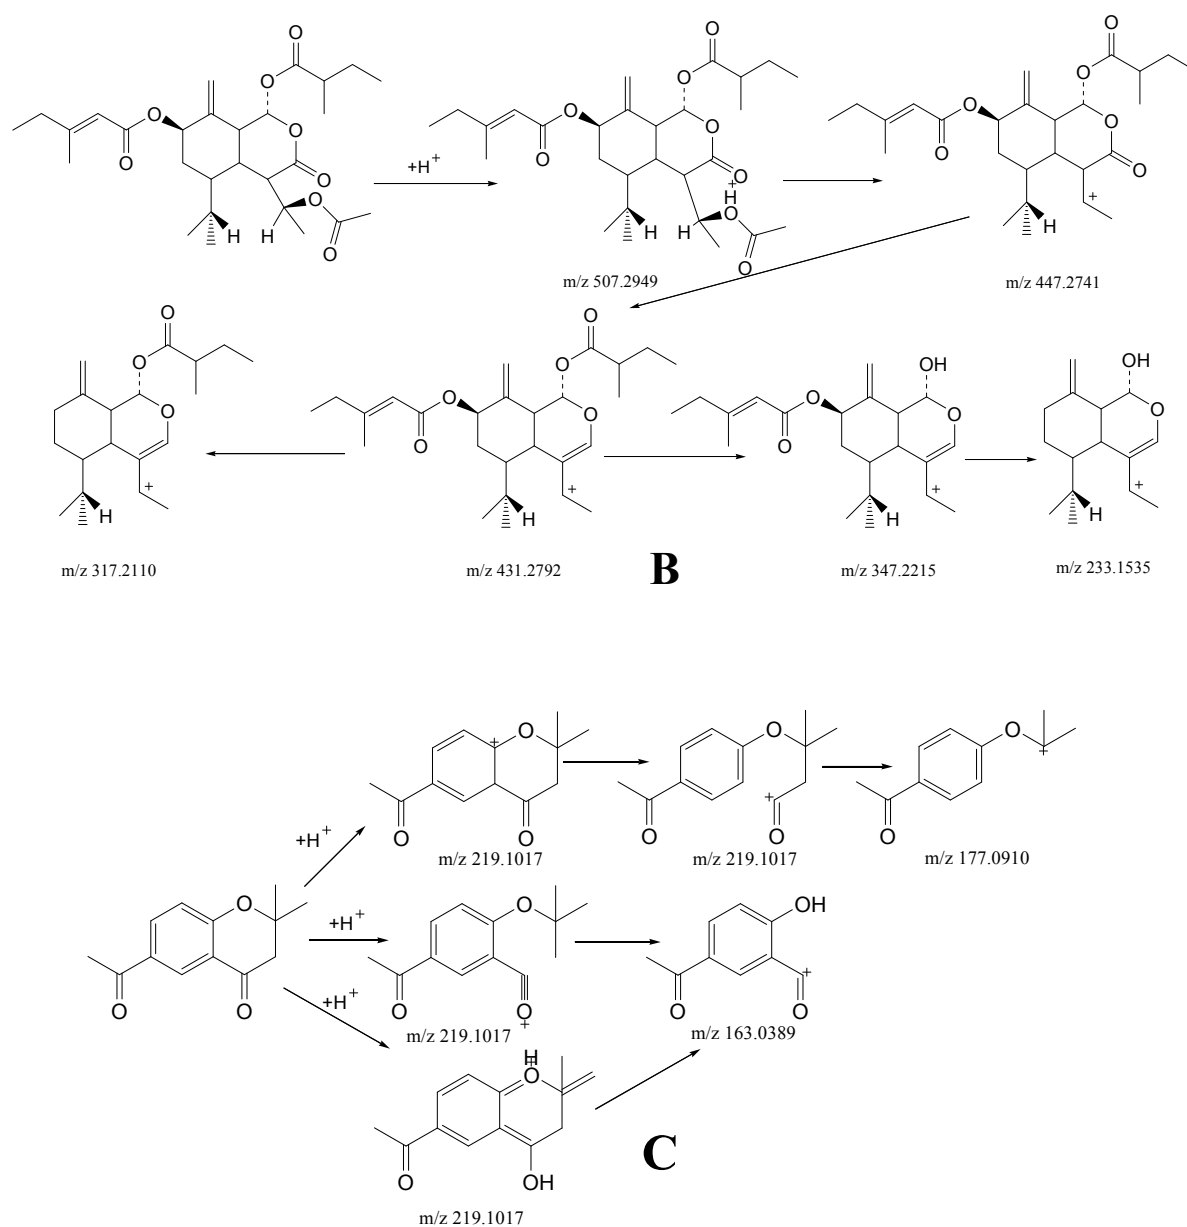

**Figure S9** The possible fragment pathways of 7β-(3'-Ethyl-cis-crotonoyloxy)-1α-(2'-methylbutyryloxy)-3(14)-dehydro-Z-notonipetranone (A), tussilagolactone (B), 2,2-dimethyl-6-acetylchromanone(C).
